# Supplementary material
Source: PubMed Central journal article supplement (PMC1941798)

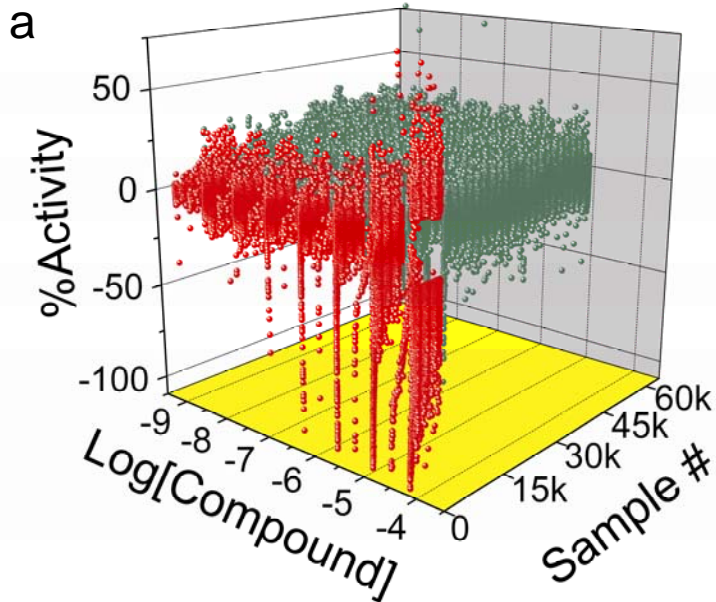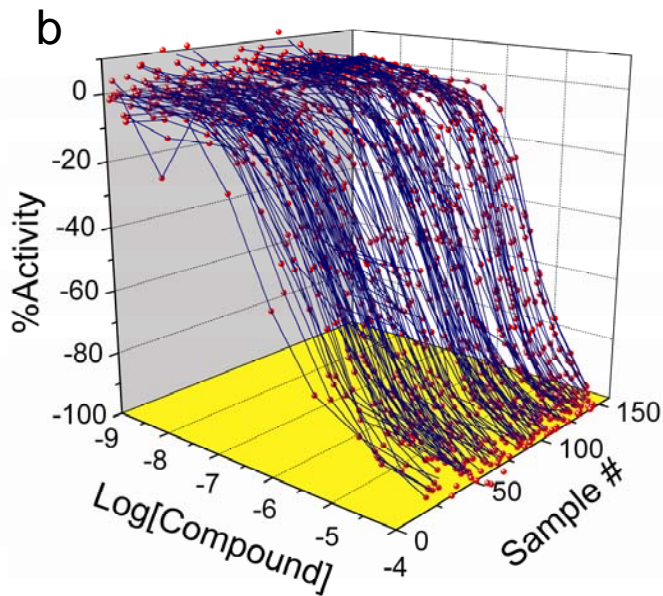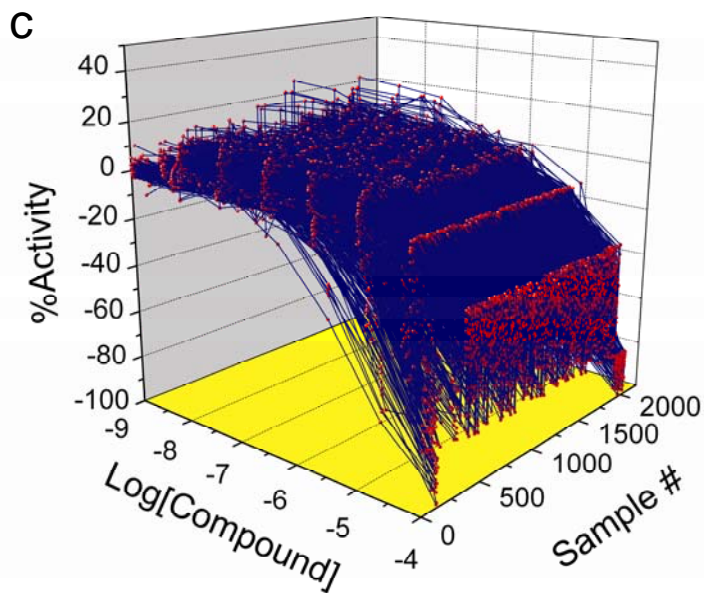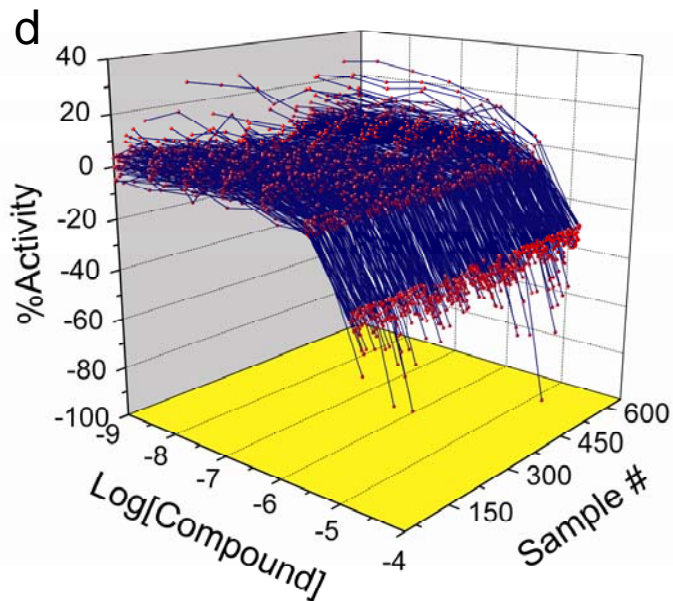

Supplement: pnas_0705637104_1.pdf [file pnas_0705637104_1.pdf]
